# Supplementary material
Source: PubMed Central journal article supplement (PMC3089565)
Supplement: supp_M111.220483_jbc.M111.220483-1.pdf [file supp_M111.220483_jbc.M111.220483-1.pdf]

SUPPLEMENTAL FIGURE 1

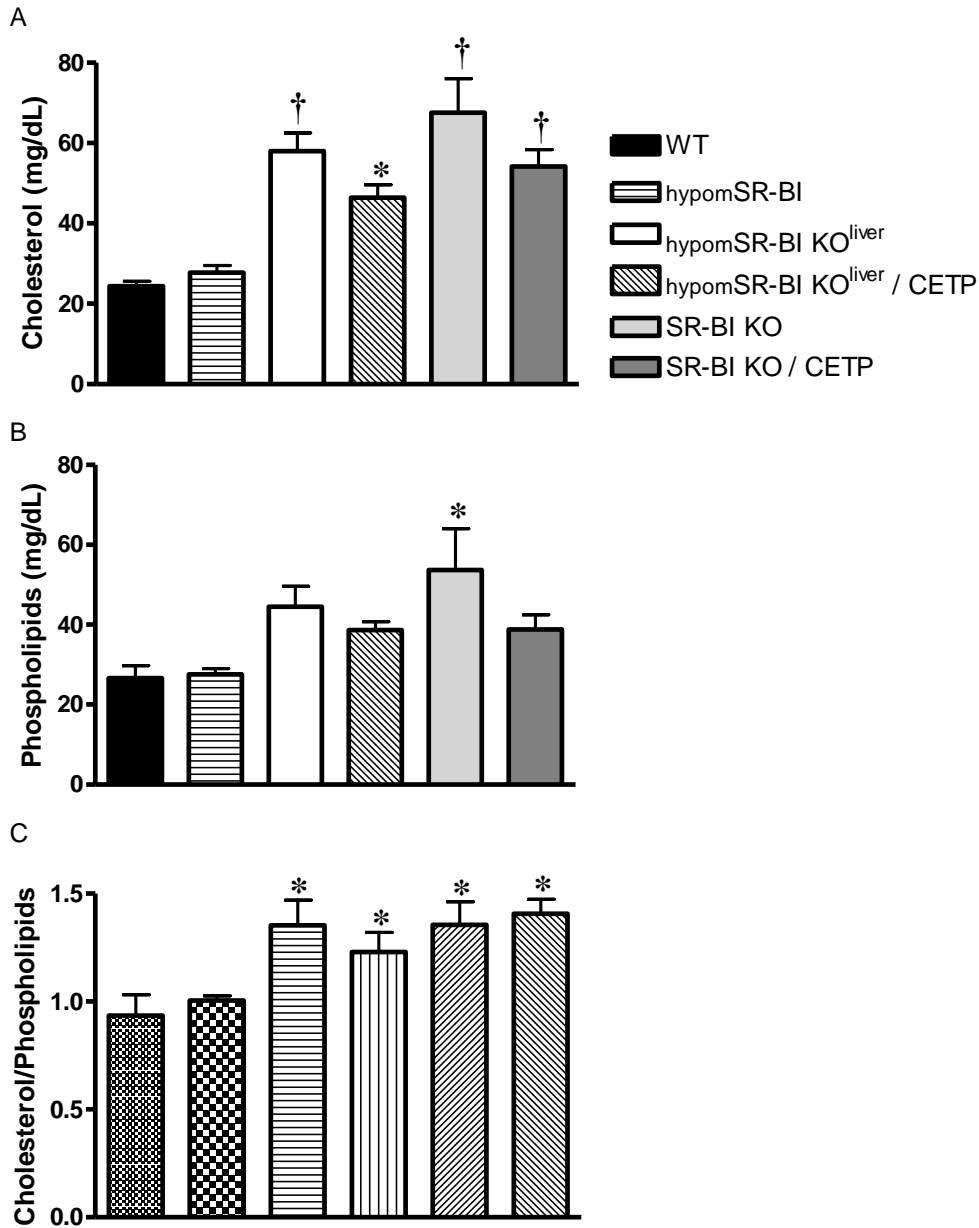

**Legend to Supplemental Figure 1:**

*Erythrocyte cholesterol and phospholipid content.* The amount of cholesterol (A) and phospholipids (B) present in erythrocytes of mice fed a 1,25C-diet was determined after lipid extraction as described in Experimental procedures. For each genotype, the cholesterol to phospholipid ratio was calculated (C). Erythrocytes from hypomSR-BI KO<sup>liver</sup> and SR-BI KO mice expressing CETP or not displayed a similar and statistically significant increase in the cholesterol-to-phospholipid ratio as compared to either WT or hypomSR-BI mice. Values represent means±SEM. \*, † statistically different from values for wild-type mice, \*p<0.05, †p<0.001.
