# Supplementary material
Source: PubMed Central journal article supplement (PMC3089565)
Supplement: supp_M111.220483_jbc.M111.220483-2.pdf [file supp_M111.220483_jbc.M111.220483-2.pdf]

SUPPLEMENTAL FIGURE 2

A

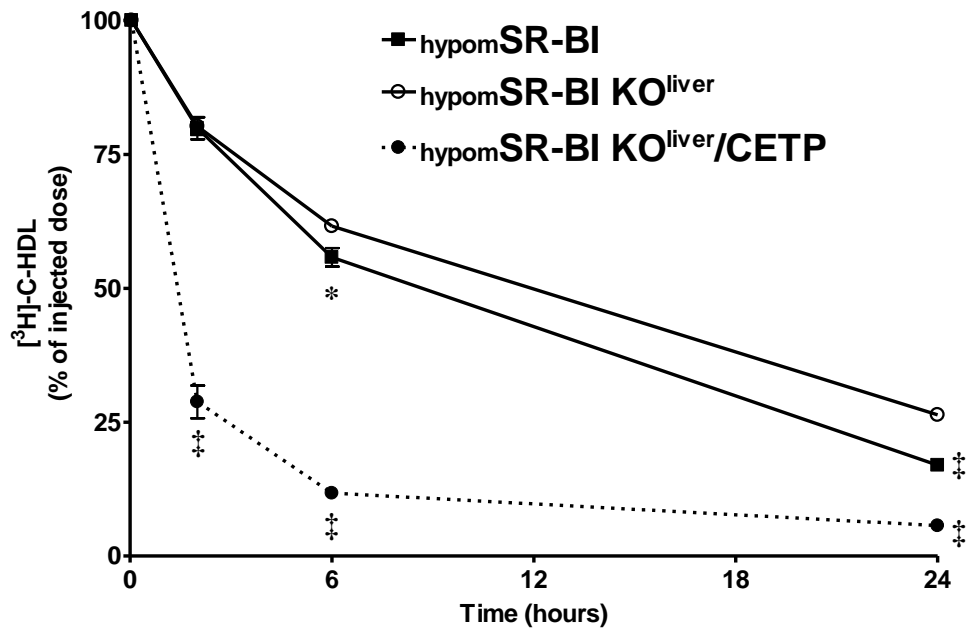

B

| Genotype        | hypomSR-BI<br>(n=10) | hypomSR-BI KO <sup>liver</sup><br>(n=8) | hypomSR-BI KO <sup>liver</sup><br>/ CETP<br>(n=6) |
|-----------------|----------------------|-----------------------------------------|---------------------------------------------------|
| Liver           | 71±2 (21±1)          | 39±2 † (13±1)                           | 106±5 †, § (35±2)                                 |
| Feces           | 33±2 (3.5±0.7)       | 14±1 † (1.5±0.3)                        | 37±3 § (4.4±1.1)                                  |
| Bile            | 125±10 (0.28±0.12)   | 84±7* (0.11±0.05)                       | 194±19*,§ (0.47±0.30)                             |
| Adrenal         | 170±7 (0.18±0.05)    | 158±8 (0.17±0.02)                       | 153±17 (0.14±0.04)                                |
| Kidney          | 8.0±0.5 (0.42±0.05)  | 9.1±0.7 (0.48±0.08)                     | 8.7±0.3 (0.45±0.04)                               |
| Spleen          | 9.8±0.4 (0.23±0.04)  | 10±0.4 (0.91±0.12)                      | 9.5±0.6 (0.84±0.18)                               |
| Red Blood Cells | 6.4±0.3 (1.9±0.3)    | 12±0.3 † (4.1±0.3)                      | 11±0.6 † (3.9±0.5)                                |

**Legend to Supplemental Figure 2 :**

*Impact of CETP and SR-BI expression on the metabolic fate of HDL-C.* (A) Plasma decay over 24h of [3H]cholesterol-labeled mouse HDL injected in hypomSRBI, hypomSRBI KO<sup>liver</sup> and hypomSRBI KO<sup>liver</sup>/CETP female mice fed a 1,25C-diet. \*, ‡, statistically different from values for hypomSRBI KO<sup>liver</sup> mice at the indicated time point \* p<0.05, ‡ p<0.001. (B) 24h post-injection the animals were sacrificed and the tissue distribution of radioactivity was determined. Data are expressed as CPM/mg of wet tissue or dried feces, except for bile and red blood cells for which values are expressed as CPM/μL. Values represent means±SEM. Values in parentheses correspond to the percentage of the injected dose present in the organ. \*, † statistically different from values for hypomSRBI mice, \*p<0.05, †p<0.001. ‡, § statistically different from values for hypomSRBI KO<sup>liver</sup> mice, ‡ p<0.05, § p<0.001.
