# Supplementary material
Source: PubMed Central journal article supplement (PMC3089565)
Supplement: supp_M111.220483_jbc.M111.220483-3.pdf [file supp_M111.220483_jbc.M111.220483-3.pdf]

SUPPLEMENTAL FIGURE 3

A/

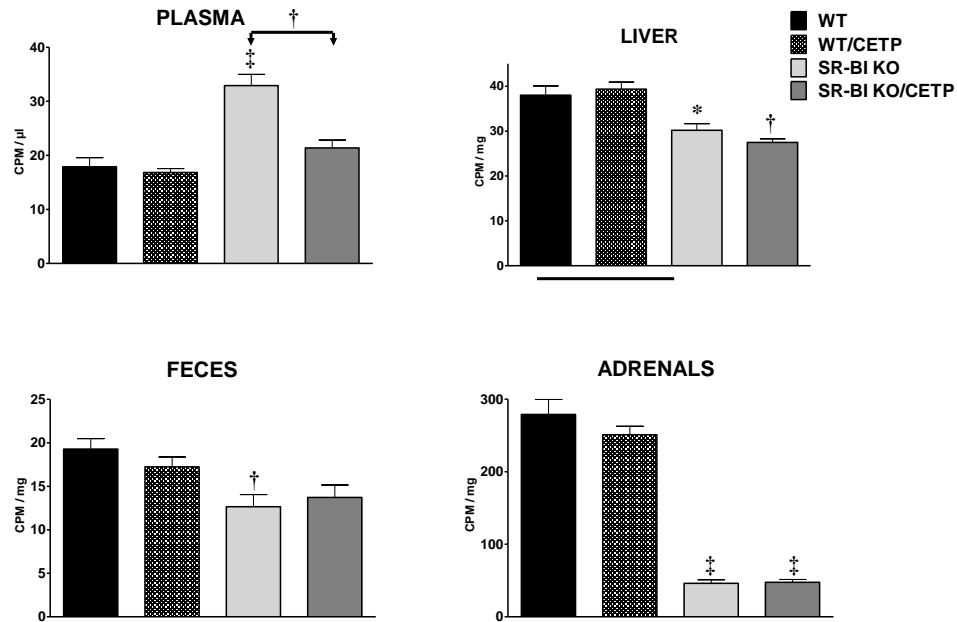

B/

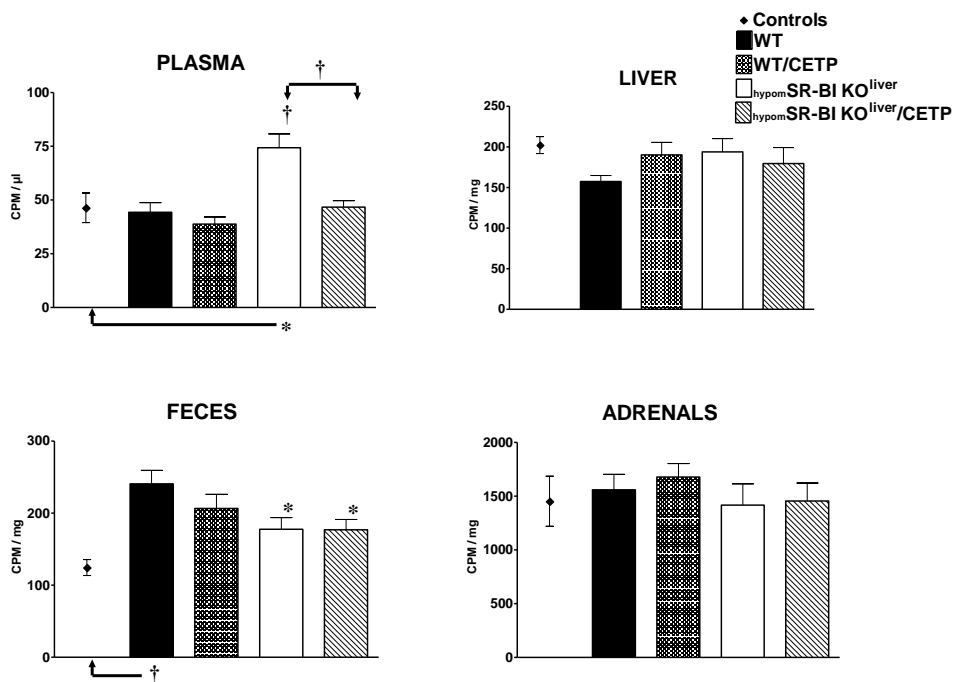

**Legend to Supplemental Figure 3:**

*In vivo macrophage-to-feces RCT studies.* Mice were injected intraperitoneally with [<sup>3</sup>H]cholesterol-labeled BM-derived macrophages and the amount of radioactivity present in plasma, liver, feces and adrenals was determined 48-hours later. RCT experiments were performed in 3 to 4-month-old (A)female mice (n=4-7) fed a chow diet, and (B)female mice (n=5-6) fed a chow diet containing 0.005% ezetimibe for 11 days and control wild-type mice (controls, n=3) fed a chow diet. Data represent means $\pm$ SEM. \*p<0.05, †p<0.01, ‡p<0.001
